CORRECTION

# Correction: Effects of Climate Change on Habitat Availability and Configuration for an Endemic Coastal Alpine Bird

Michelle M. Jackson, Sarah E. Gergel, Kathy Martin

There is an error in the second sentence of the fifth paragraph of the Results section. The correct sentence is: This increase in number of patches by the 2080s corresponds with a 52% reduction in mean patch size from 0.66 km<sup>2</sup> to 0.32 (± 0.03) km<sup>2</sup> under the RCP 4.5 scenario and a 79% reduction in mean patch size to 0.14 (± 0.01) km<sup>2</sup> under the RCP 8.5 scenario.

## Reference

1. Jackson MM, Gergel SE, Martin K (2015) Effects of Climate Change on Habitat Availability and Configuration for an Endemic Coastal Alpine Bird. PLoS ONE 10(11): e0142110. doi: [10.1371/journal.pone.0142110](https://doi.org/10.1371/journal.pone.0142110) PMID: [26529306](https://pubmed.ncbi.nlm.nih.gov/26529306/)

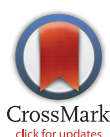

## OPEN ACCESS

**Citation:** Jackson MM, Gergel SE, Martin K (2016) Correction: Effects of Climate Change on Habitat Availability and Configuration for an Endemic Coastal Alpine Bird. PLoS ONE 11(1): e0146838. doi:10.1371/journal.pone.0146838

**Published:** January 5, 2016

**Copyright:** © 2016 Jackson et al. This is an open access article distributed under the terms of the [Creative Commons Attribution License](https://creativecommons.org/licenses/by/4.0/), which permits unrestricted use, distribution, and reproduction in any medium, provided the original author and source are credited.
